# Supplementary material
Source: PubMed Central journal article supplement (PMC4790020)
Supplement: yarl000390.ww1_default.pdf [file yarl000390.ww1_default.pdf]

## **Web appendix: Sensitivity, per protocol, and post hoc exploratory analyses**

### **1. Analysis of effects of baseline group differences and missing data on primary outcome**

#### **METHODS**

Sensitivity analysis was performed on the Vertigo Symptom Scale - Short Form at 12 weeks to adjust for differences in baseline measures and increase the number of subjects available for analysis by replacing missing data using multiple imputation.

#### **RESULTS**

Comparison of group baseline characteristics revealed differences in potentially important prognostic variables: age left school, gender, duration of dizziness, consultation with a health care professional in the past year and exceeding the HAD threshold for anxiety or depression. Sensitivity analysis adjusting for these imbalances and replacing missing data using multiple imputation was performed for on the Vertigo Symptom Scale - Short Form. At 12 weeks follow-up, there was an adjusted mean difference compared with routine care of -2.15 (-4.23 to -0.09,  $P=0.041$ ) in the booklet with telephone support group and an adjusted mean difference of -0.73 (-2.63 to 1.17,  $P=0.451$ ) in the booklet self-management group. At 1 year follow-up, there was an adjusted mean difference compared with routine care of -2.55 (-4.77 to -0.32,  $P=0.025$ ) in the booklet with telephone support group and an adjusted mean difference of -2.54 (-4.51 to -0.56,  $P=0.012$ ) in the booklet self-management group.

### **2. Per protocol analysis**

#### **METHODS**

Participants were defined as 'per protocol' if they reported carrying out the rehabilitation exercises for as long as recommended, i.e. at least nine weeks or until their symptoms resolved (if this was sooner). The per protocol analysis was an ANCOVA comparing VSS-SF scores at 12 weeks (controlling for baseline VSS-SF scores) in those who were and were not per protocol.

#### **RESULTS**

Per protocol analysis confirmed better outcomes in those who reported full adherence to the treatment programme at 12 weeks, with an adjusted mean difference compared with routine care of -2.94 (-5.00 to -0.89,  $P=0.005$ ) in the booklet with telephone support group and a mean difference of -3.38 (-5.59 to -1.17,  $P=0.003$ ) in the booklet self-management group.

### **3. Cost-effectiveness sensitivity analyses**

#### **METHODS**

We carried out a number of sensitivity analysis to investigate the effects of assumptions made during the analysis of cost-effectiveness data. These were:

- a. The base-case analysis assumed that providing the booklet was costless. We tested the effect of assuming that 5 minutes of GP time would be required to provide and explain the booklet.
- b. Our base-case analysis was carried out on a complete case analysis of 235 participants. The main source of missing data was incomplete EQ5D values leading

to inability to estimate QALYs. We imputed missing QALY values in order to analyse a larger sample of patients (333).

- c. Our base-case analysis used NHS costs only, we also carried out a sensitivity analysis where we included a cost for participant time spent completing exercises.

See Table 9 for unit costs used for all parameters.

Table 9. Unit costs used for all cost parameters

| Cost item                                    | Unit cost | Source        |
|----------------------------------------------|-----------|---------------|
| GP home visits                               | 108       | PSSRU         |
| GP in surgery                                | 32        | PSSRU         |
| Telephone conversation with GP               | 20        | PSSRU         |
| Practice nurse                               | 12        | PSSRU         |
| Counsellor                                   | 71        | PSSRU         |
| Outpatient visits                            | 85        | NHS ref costs |
| A&E                                          | 111       | NHS ref costs |
| Audiologist                                  | 57.4      | NHS ref costs |
| Physiotherapist                              | 20.84     |               |
| Private doctor                               | 85        | NHS ref costs |
| Inpatient stay                               | 2849      | NHS ref costs |
| Medicines                                    |           | BNF           |
| Telephone conversation with study therapists | 12.94865  | Various       |
| Cost of booklet                              | 0.34      | Study data    |
|                                              |           | Dept of       |
| Cost per hour of time                        | 5.79      | transport     |

## RESULTS

Including the cost of GP time increased costs by approximately £14. The booklet self-management group no longer dominated routine care. ICERs were £346 and £1292 per QALY for booklet self-management compared to routine care and telephone support compared to booklet self-management respectively. Imputing missing data had very little effect; the routine care group was still dominated. Compared to booklet self-management alone telephone support generated QALYs at a cost of £1451 per QALY. Including the cost of participant time to complete exercises increased ICERs to £997 and £1488 (booklet self-management group compared to routine care, and telephone support group compared to booklet self-management respectively). In all three sensitivity values there were only small changes to results with no changes to the conclusions, i.e. the intervention groups still appeared cost-effective compared to routine care.

## 4. Post hoc exploratory analyses

### METHODS

For the comparisons between treatment groups, all continuous outcomes were evaluated using ANCOVA, adjusting for the level of the relevant outcome variable at baseline as well as baseline symptom score (the stratification variable). Binary group outcomes were compared using logistic regression, also adjusting for baseline symptom score. Independent t-tests were used to compare intervention groups on all measures of adherence to rehabilitation exercises.

## RESULTS

There were no significant differences between the treatment groups on outcome measures at 12 weeks and one year (see Table 10) apart from an isolated finding of greater improvement in the telephone support group on the autonomic-anxiety subscale at 12 weeks. However, Table 11 shows that the telephone support group reported spending more time on all of the rehabilitation exercises apart from the core set of basic exercises (head movements while sitting).

**Table 10. Adjusted mean differences (95% CI) comparing the two intervention groups at 12 weeks and one year on all measures.**

|                                             | Adjusted mean difference*<br>(95% CI)      |                                            |
|---------------------------------------------|--------------------------------------------|--------------------------------------------|
|                                             | 12 weeks                                   | One year                                   |
| Vertigo Symptom Score – Short Form          | -1.15 (-3.12 to 0.83)<br>P=0.253           | -0.13 (-1.92 to 1.67)<br>P=0.890           |
| Number (%) reporting subjective improvement | Odds Ratio*=0.92 (0.53 to 1.60)<br>P=0.771 | Odds Ratio*=1.55 (0.85 to 2.81)<br>P=0.151 |
| Vertigo- balance subscale                   | -0.28 (-1.64 to 1.07)<br>P=0.678           | 0.09 (-1.11 to 1.30)<br>P=0.881            |
| Autonomic-anxiety subscale                  | -0.98 (-1.90 to -0.06)<br>P=0.037          | -0.19 (-1.09 to 0.70)<br>P=0.672           |
| Dizziness Handicap Inventory                | -0.13 (-4.26 to 4.00)<br>P=0.949           | -0.36 (-4.68 to 3.96)<br>P=0.869           |
| HADS Anxiety                                | 0.26 (-0.40 to 0.93)<br>P=0.433            | -0.44 (-1.36 to 0.47)<br>P=0.340           |
| HADS Depression                             | 0.26 (-0.40 to 0.93)<br>P=0.433            | -0.51 (-1.28 to 0.27)<br>P=0.197           |
| EQ5-D                                       | 0.004 (-0.05 to 0.05)<br>P=0.871           | 0.01 (-0.03 to 0.06)<br>P=0.557            |

\*All analyses were adjusted for baseline levels of the stratification variable, the Vertigo Symptom Scale – Short Form, and for baseline levels of the dependent variable.

**Table 11 = Comparison of intervention groups on measures of adherence.**

|                                                                 | <b>Booklet with telephone support (mean (SD))</b> | <b>Booklet self-management (mean (SD))</b> | <b>Mean difference (95% CI)</b> |
|-----------------------------------------------------------------|---------------------------------------------------|--------------------------------------------|---------------------------------|
| How many times a week on average did you carry out the therapy? | 3.18 (1.12)<br>n = 80                             | 2.76 (1.20)<br>n = 85                      | -.41 (-.77 to -.53)<br>P=.025   |
| How many times a day on average did you carry out the therapy?  | 1.39 (0.58)<br>n = 80                             | 1.21 (0.58)<br>n = 86                      | -.18 (-.36 to -.00)<br>P=.050   |
| Total time spent sitting                                        | 2.58 (1.60)<br>n = 78                             | 2.19 (1.58)<br>n = 85                      | -.39 (-.88 to .10)<br>P=.122    |
| Total time spent standing                                       | 2.59 (1.49)<br>n = 79                             | 2.10 (1.58)<br>n = 83                      | -.50 (-.98 to -.02)<br>P=.040   |
| Total time spent walking                                        | 2.54 (1.92)<br>n = 76                             | 1.41 (1.68)<br>n = 82                      | -1.12 (-1.69 to -.56)<br>P=.000 |
| Total time spent on special exercises                           | 2.19 (2.02)<br>n = 67                             | 1.49 (1.84)<br>n = 78                      | -.71 (-1.35 to -.07)<br>P=.031  |
| Total time spent on general activities                          | 2.72 (2.11)<br>n = 68                             | 1.74 (1.95)<br>n = 78                      | -.98 (-1.64 to -.31)<br>P=.004  |
